# Supplementary material for: Wear Behavior Characterization of Hydrogels Constructs for Cartilage Tissue Replacement
Source: Materials (Basel). 2021 Jan 16;14(2):428. doi: 10.3390/ma14020428 (PMC7830039; doi:10.3390/ma14020428)
Supplement: Supplementary file 1 [file materials-14-00428-s001.pdf]

Supplementary Material

# Wear Behavior Characterization of Hydrogels Constructs for Cartilage Tissue Replacement

Saverio Affatato <sup>1,\*</sup>, Diego Trucco <sup>2,3,4</sup>, Paola Taddei <sup>5</sup>, Lorenzo Vannozzi <sup>3,4</sup>, Leonardo Ricotti <sup>3,4</sup>, Gilbert Daniel Nessim <sup>6</sup> and Gina Lisignoli <sup>2</sup>

<sup>1</sup> IRCSS Istituto Ortopedico Rizzoli, Laboratorio di Tecnologia Medica, 40136 Bologna, Italy

<sup>2</sup> IRCSS Istituto Ortopedico Rizzoli, SC Laboratorio di Immunoreumatologia e Rigenerazione Tissutale, 40136 Bologna, Italy; diego.trucco@santannapisa.it (D.T.); gina.lisignoli@ior.it (G.L.)

<sup>3</sup> The BioRobotics Institute, Scuola Superiore Sant'Anna, Piazza Martiri della Libertà 33, 56127 Pisa, Italy; lorenzo.vannozzi@santannapisa.it (L.V.); leonardo.ricotti@santannapisa.it (L.R.)

<sup>4</sup> Department of Excellence in Robotics & AI, Scuola Superiore Sant'Anna, Piazza Martiri della Libertà 33, 56127 Pisa, Italy

<sup>5</sup> Dipartimento di Scienze Biomediche e Neuromotorie, Università di Bologna, Via Belmeloro 8/2, 40126 Bologna, Italy; paola.taddei@unibo.it

<sup>6</sup> Department of Chemistry, Bar-Ilan Institute for Nanotechnology and Advanced Materials, Bar-Ilan University, Ramat Gan 52900, Israel; Gilbert.Nessim@biu.ac.il

\* Correspondence: affatato@tecno.ior.it; Tel.: +39-051-6366864

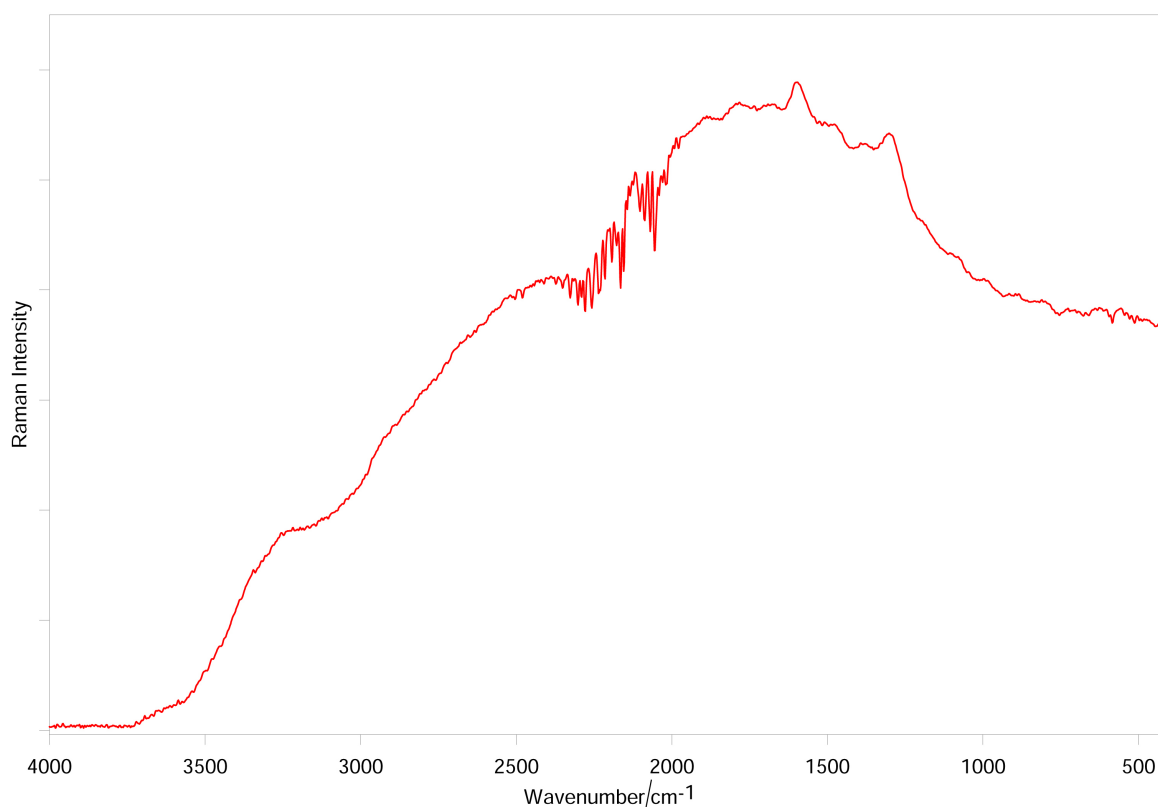

**Figure S1.** Raman spectrum of DEEP+GO/SUP+GO; the strong spectral background does not allow any reliable characterization of the polymeric phase.

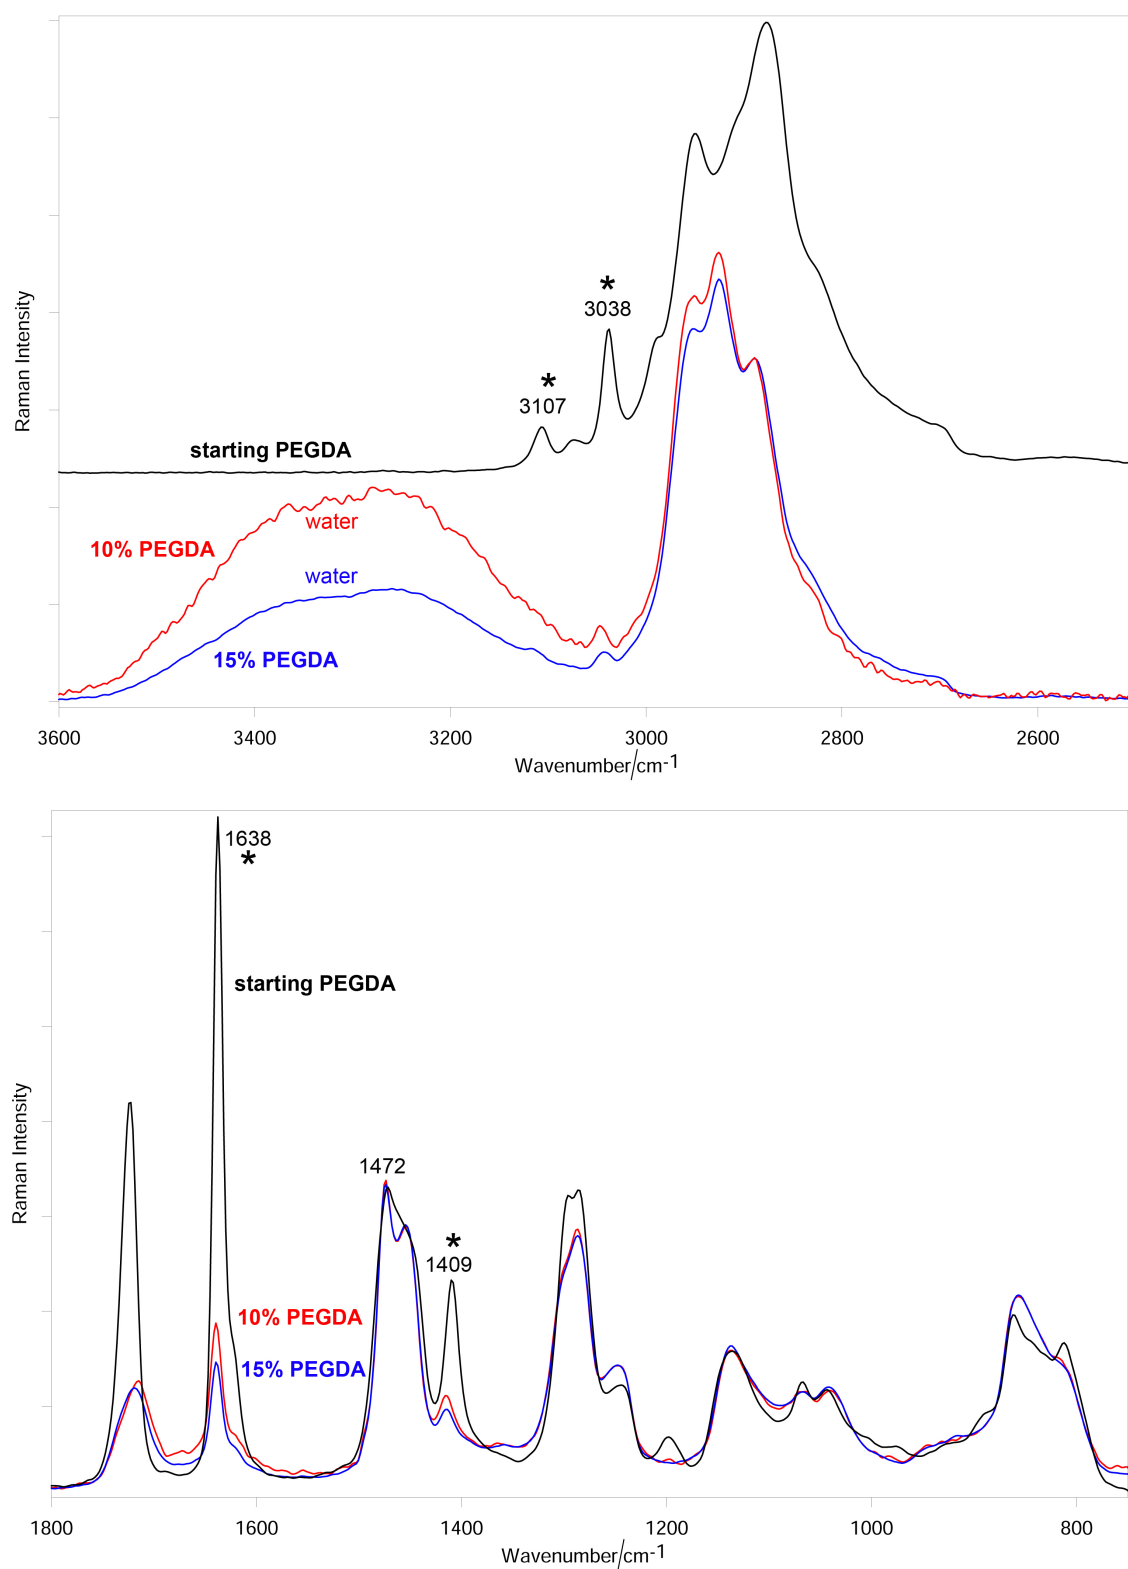

**Figure S2.** Average Raman spectra of starting PEGDA as well as photo-crosslinked 10% and 15% PEGDA hydrogels (wet samples). The spectra are normalized to the intensity of the  $\text{CH}_2$  bending band at about 1470  $\text{cm}^{-1}$ . The main bands that decrease in intensity upon photo-crosslinking (assignable to diacrylate groups) are indicated with an asterisk.

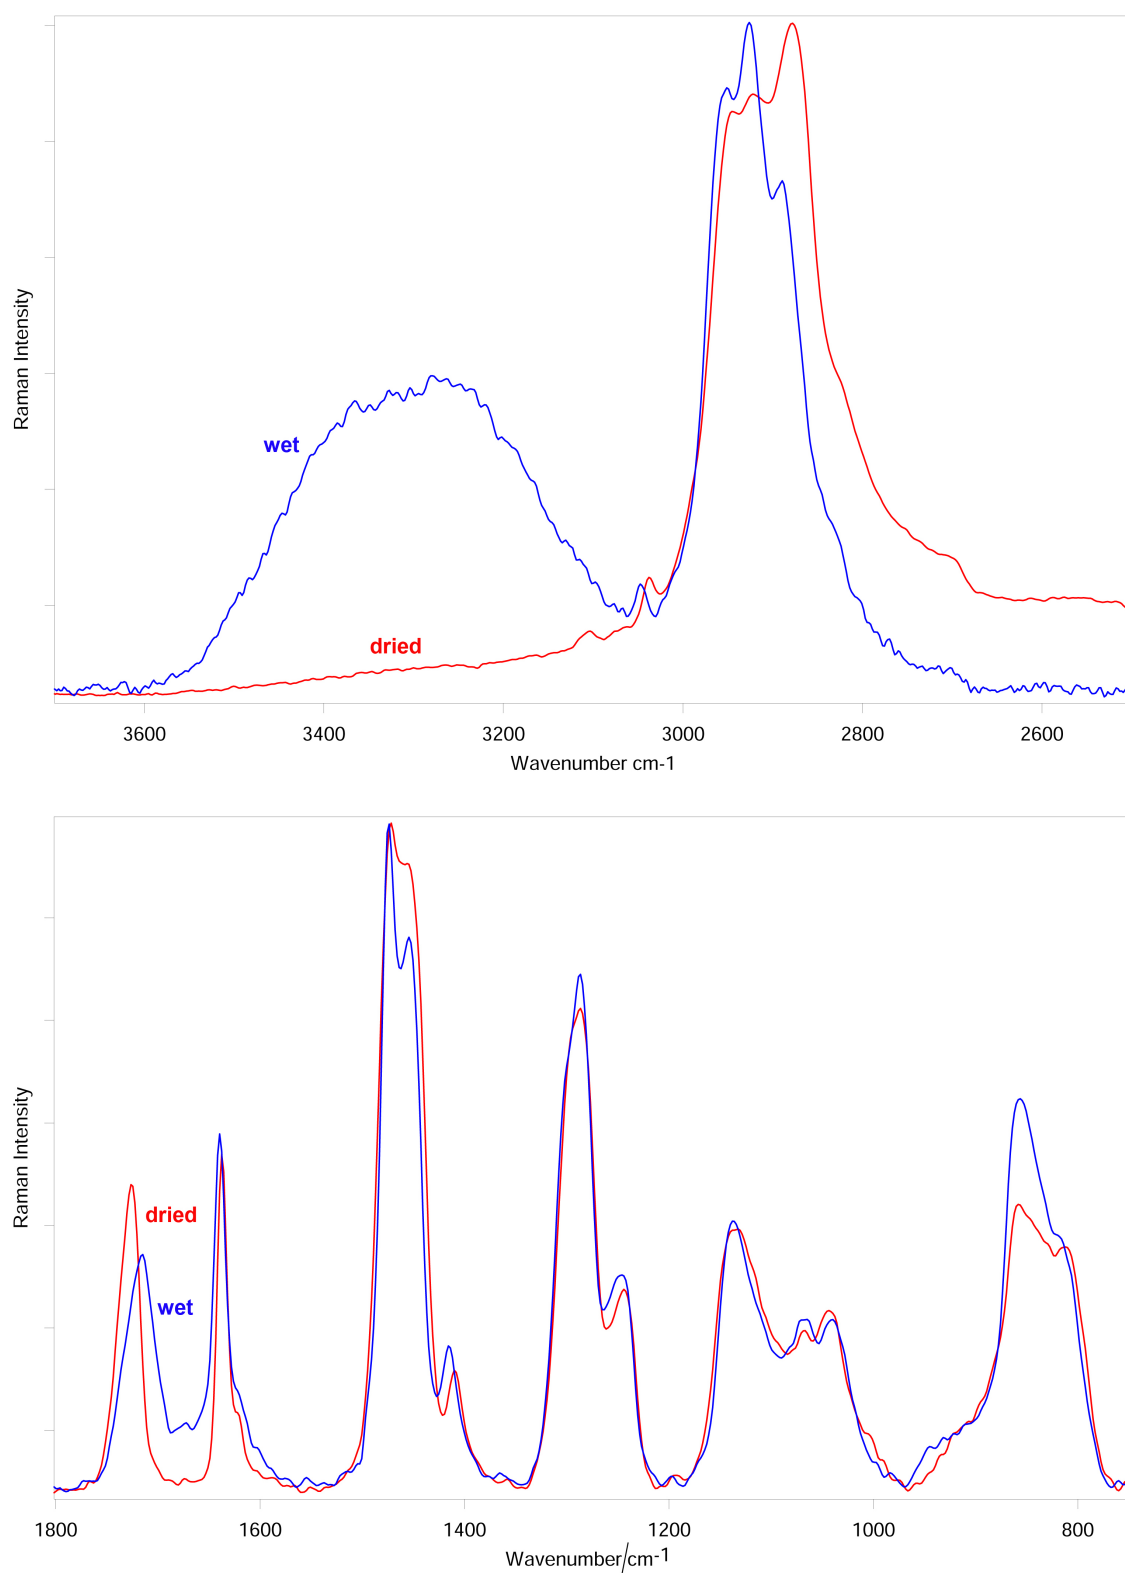

**Figure S3.** Average Raman spectra of photo-crosslinked 10% PEGDA hydrogel (dried and wet samples). The spectra are normalized to the intensity of the  $\text{CH}_2$  bending band at about  $1470 \text{ cm}^{-1}$ .

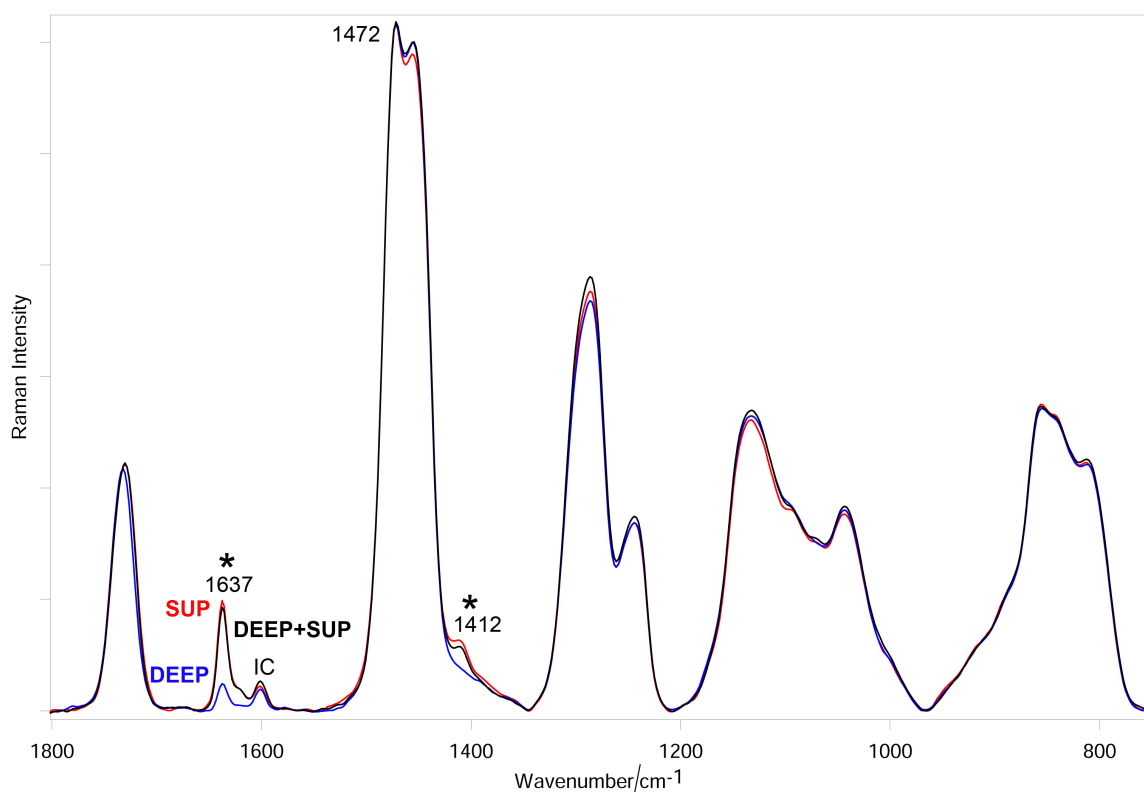

**Figure S4.** Average Raman spectra (normalized to the intensity of the CH<sub>2</sub> bending band at about 1470 cm<sup>-1</sup>) of SUP, DEEP and DEEP+SUP hydrogels after drying. The main bands that decrease in intensity upon photo-crosslinking (assignable to diacrylate groups) are indicated with an asterisk. The band at 1601 cm<sup>-1</sup> is assignable to Irgacure2959 (IC).

**Table S1.** Wavenumbers (cm<sup>-1</sup>) and assignments [34-36] of the main Raman bands of PEGDA and photo-crosslinked 10% PEGDA hydrogel (dried and wet samples). The main bands that decrease in intensity upon photo-crosslinking are indicated in bold characters; they are prevalently assignable to the diacrylate groups that are involved in crosslinking.

| Wavenumber (cm <sup>-1</sup> ) |                                     |                                   | Assignments           |
|--------------------------------|-------------------------------------|-----------------------------------|-----------------------|
| PEGDA                          | crosslinked 10% PEGDA, dried sample | crosslinked 10% PEGDA, wet sample |                       |
|                                |                                     | 3360-3250 (broad)                 | water OH stretching   |
| <b>3107</b>                    | <b>3106</b>                         |                                   | <b>=CH stretching</b> |
| <b>3038</b>                    | <b>3037</b>                         | <b>3046</b>                       | <b>=CH stretching</b> |
| 2950                           | 2943                                | 2953                              | alkyl CH stretching   |
|                                | 2923                                | 2926                              | alkyl CH stretching   |
| 2877                           | 2877                                | 2890                              | alkyl CH stretching   |
| 1723                           | 1728                                | 1716                              | C=O stretching        |
| <b>1638</b>                    | <b>1637</b>                         | <b>1639</b>                       | <b>C=C stretching</b> |

|             |             |             |                                                                      |
|-------------|-------------|-------------|----------------------------------------------------------------------|
| 1472        | 1472        | 1474        | CH <sub>2</sub> bending                                              |
| 1458        | 1455        | 1454        | CH <sub>3</sub> antisymmetric bending and CH <sub>2</sub> scissoring |
| <b>1409</b> | <b>1410</b> | <b>1415</b> | <b>=CH<sub>2</sub> twisting or wagging</b>                           |
| 1286        | 1287        | 1287        | ester group                                                          |
| 1246        | 1246        | 1250        | ester group                                                          |
| 1198        |             |             |                                                                      |
| 1136        | 1133        | 1137        | skeletal stretching                                                  |
| 1068        | 1069        | 1071        | skeletal stretching                                                  |
| 1043        | 1043        | 1042        | skeletal stretching                                                  |
| 862         | 857         | 857         |                                                                      |
| 813         | 813         | 816         |                                                                      |
